# Supplementary material for: Manipulation of liquid droplets using amphiphilic, magnetic one-dimensional photonic crystal chaperones
Source: Springer Nature journal article supplement (doi:10.1038/nmat1253), 2004-11-07
Supplement: 41563_2004_BFnmat1253_MOESM1_ESM.pdf [file 41563_2004_BFnmat1253_MOESM1_ESM.pdf]

Supplementary Figures

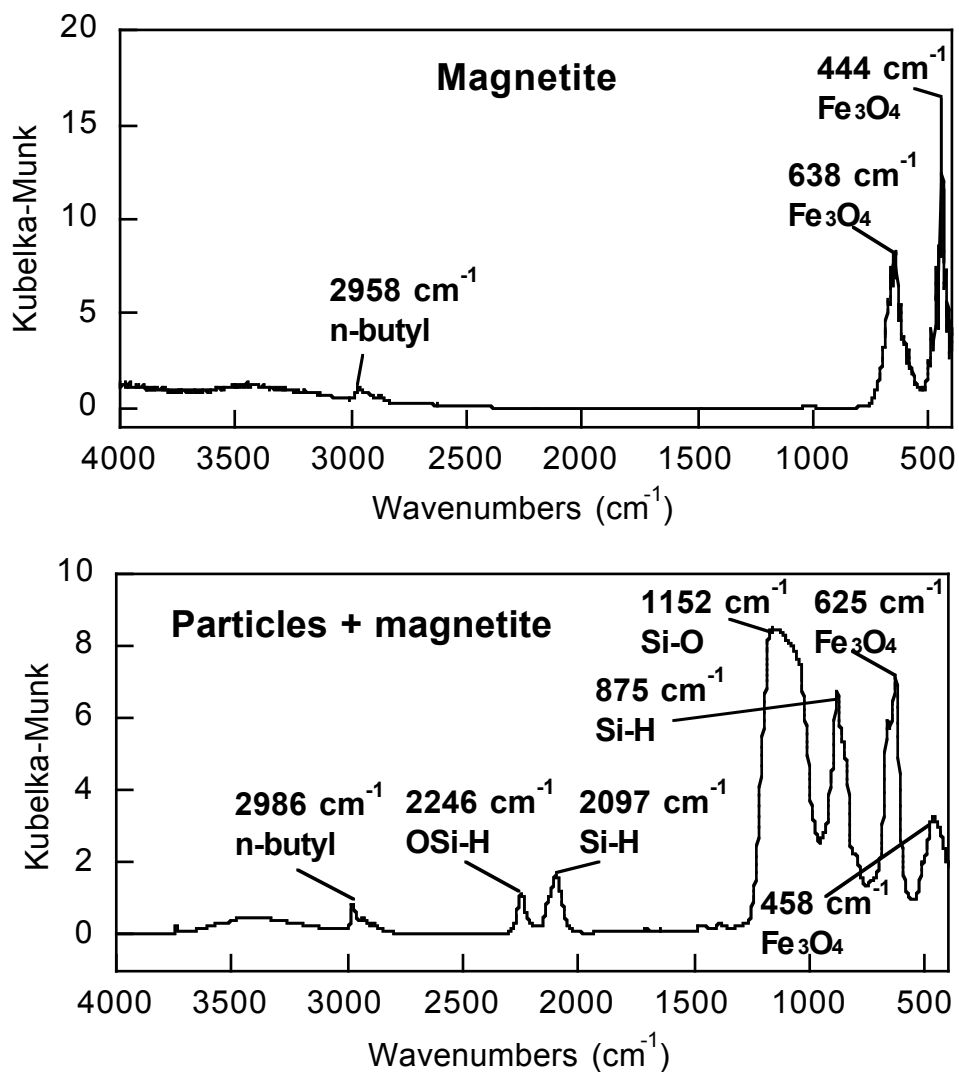

**Supplementary Figure 1.** Diffuse reflectance Fourier transform infrared (FTIR) spectra of magnetite prepared as described in the text (top), and a layer of a freshly etched porous Si film after treatment with the magnetite nanoparticles (bottom), showing the presence of magnetite and the oxidation that occurs during the magnetite infusion process.

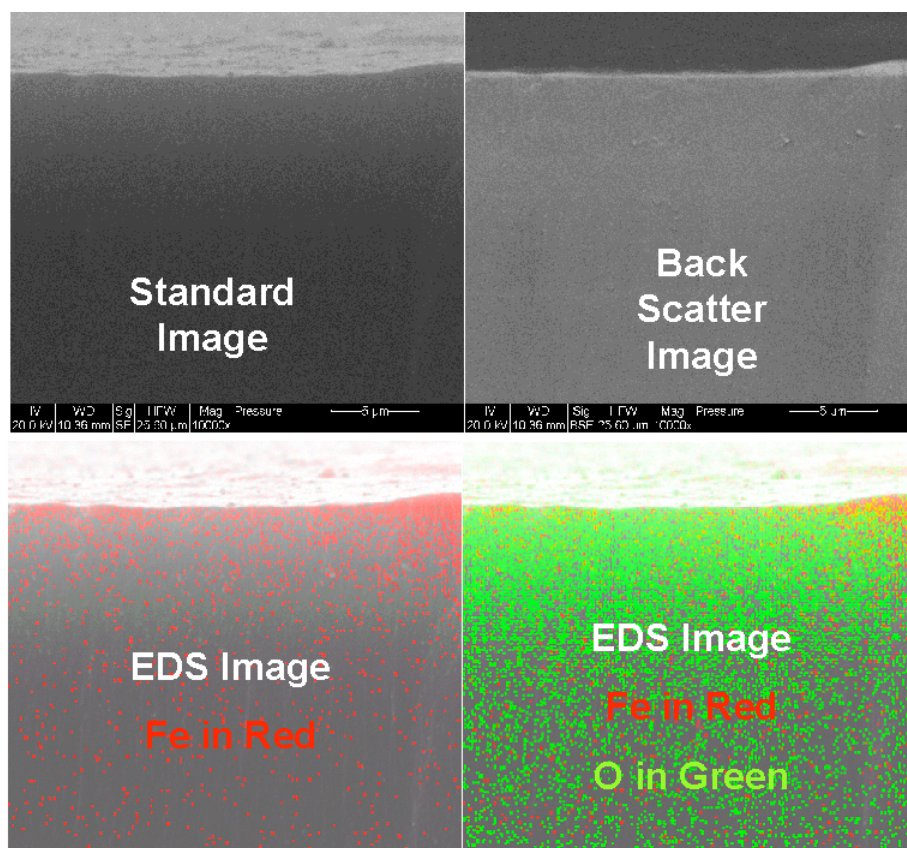

**Supplementary Figure 2.** Cross-sectional electron microscope analysis of a porous Si film treated with Fe<sub>3</sub>O<sub>4</sub> nanoparticles. Secondary electron image (upper left) showing the porous silicon film. Backscattered electron image is shown in upper right. The X-ray spectral maps, shown at the lower left and right, confirm the presence of Fe in the nanostructure.

**Caption for Supplementary Movie Clip.** The movie shows two droplets (4mm diameter) containing encoded chaperones submersed in a solution of octadecene containing 5% CH<sub>2</sub>Cl<sub>2</sub>. The chaperones on the left exhibit a single peak spectral bar code and contain 0.1 M KI<sub>(aq)</sub>. The chaperones on the right exhibit a double peak spectral bar code and contain 0.1M AgNO<sub>3(aq)</sub>. Both particle/droplet assemblies respond to a magnet held underneath the Al dish, and are combined under the influence of this magnet to form a single drop. Within this single drop the I<sup>-</sup><sub>(aq)</sub> and Ag<sup>+</sup><sub>(aq)</sub> combine to form a yellow/white precipitate of AgI. The mixture of chaperone particles on the outside of the drop now display a triple peak spectral bar code, as shown in Fig. 4 of the text.
